# Supplementary material
Source: Springer Nature journal article supplement (https://www.springermedizin.de/resource/supplementary/12884_2011_582_MOESM2_ESM.pdf/9457944)
Supplement: MOESM2 [file 9457944]

## Study population

n=306

**No response**

n= 46

**Postal return to**

**sender**

n= 10

**Evaluable questionnaires**

n=250

**Not meeting criteria  
(n=50):**

Father of second child

n=28

Father not at birth

n=8

Non Swedish speaking

n=7

Single Mother, father not available

**Eligible participants**

n=200
